# Supplementary material for: Development of diagnostic algorithm using machine learning for distinguishing between active tuberculosis and latent tuberculosis infection
Source: Springer Nature journal article supplement (doi:10.1186/s12879-022-07954-7), 2022-12-29
Supplement: MOESM1 [file 23865722]

## Supplementary Figure 1

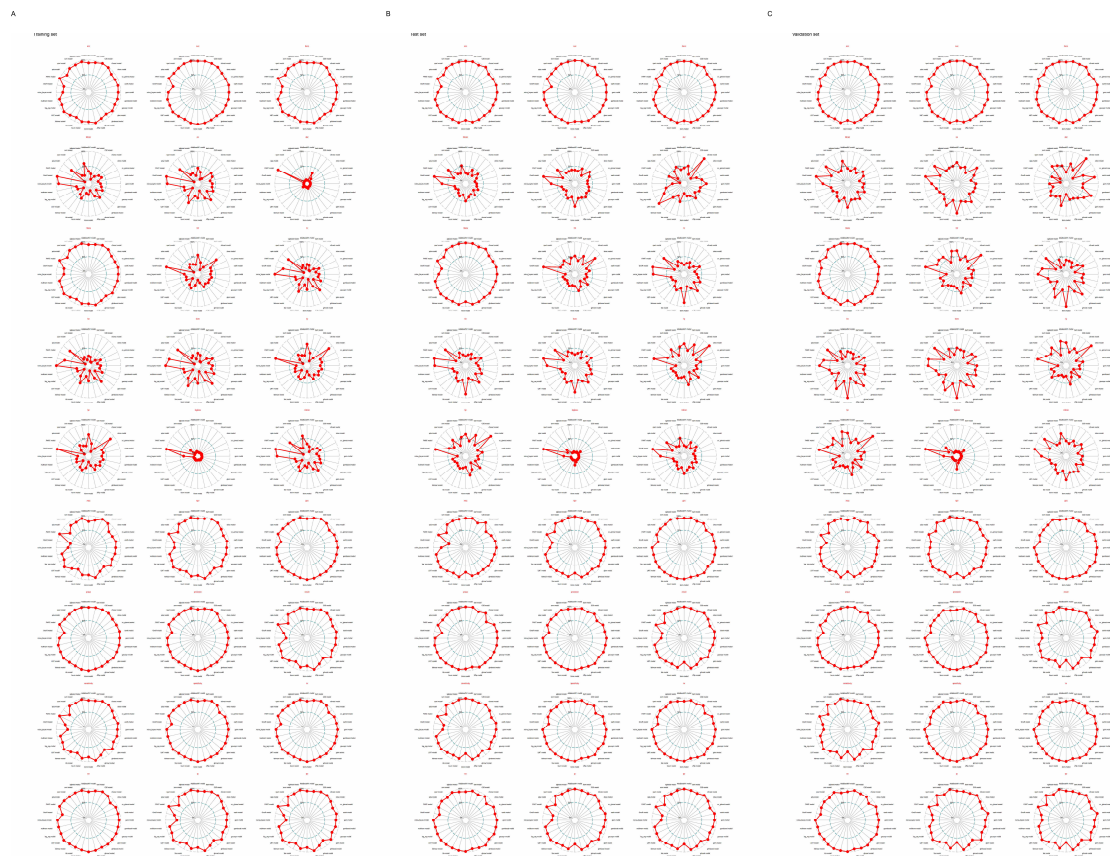

Supplementary Figure 1. Radar plot showing the performance parameters of 28 models after normalization. **(A)** training set. **(B)** test set. **(C)** validation set.
